# Supplementary material
Source: publisher figshare collection journal article supplement (https://frontiersin.figshare.com/ndownloader/files/30873562)
Supplement: Supplementary file [file 30873562]

**Supplementary Table 1:** Determination of procedural Failure

Used Definition for device success:

- Successful vascular access, delivery, deployment, and retrieval.
- Correct position of the device in the proper anatomical location.
- Intended performance defined as
  - o AVA > 1.2 and Mean gradient <20 mmHg OR
  - o Peak Velocity <3m/s and no moderate-to-severe aortic regurgitation.

| No. | Device<br>Implantation<br>Success | AVA <1.2<br>Cm <sup>2</sup> | AV Mean<br>Gradient<br><20 mmHg | Peak<br>Velocity <<br>3m/sec | Moderate/severe<br>regurgitation | Final<br>Judgment |
|-----|-----------------------------------|-----------------------------|---------------------------------|------------------------------|----------------------------------|-------------------|
| 1   | Yes                               | --                          | 19                              | 3.11                         | No                               | F                 |
| 2   | Yes                               | --                          | 26                              | 3.63                         | No                               | F                 |
| 3   | Yes                               | --                          | 21                              | 3.34                         | No                               | F                 |
| 4   | Yes                               | --                          | 26                              | 3.60                         | No                               | F                 |
| 5   | Yes                               | --                          | 16                              | 3.07                         | No                               | F                 |
| 6   | Yes                               | --                          | 33                              | 3.75                         | No                               | F                 |
| 7   | Yes                               | --                          | 22                              | 3.02                         | No                               | F                 |
| 8   | Yes                               | --                          | 28                              | 3.65                         | No                               | F                 |
| 9   | Yes                               | --                          | 24                              | 3.36                         | No                               | F                 |
| 10  | Yes                               | --                          | 20                              | 3.08                         | No                               | F                 |
| 11  | Yes                               |                             | 20                              | 3.02                         | No                               | F                 |
| 12  | Yes                               | --                          | 28                              | 3.44                         | No                               | F                 |
| 13  | Yes                               | --                          | 25                              | 3.32                         | No                               | F                 |
| 14  | Yes                               |                             | 30                              | 3.56                         | No                               | F                 |
| 15  | Yes                               |                             | 24                              | 4.18                         | No                               | F                 |
| 16  | Yes                               | --                          | 21                              | 3.08                         | No                               | F                 |
| 17  | Yes                               | --                          | 21                              | 2.82                         | No                               | F                 |
| 18  | Yes                               | --                          | 32                              | 3.62                         | No                               | F                 |
| 19  | Yes                               | --                          | 30                              | 3.72                         | No                               | F                 |
| 20  | Yes                               | --                          | 37                              | 4.09                         | No                               | F                 |
| 21  | Yes                               | --                          | 22                              | 3.07                         | No                               | F                 |
